# Supplementary material
Source: publisher site journal article supplement (https://en-cdn.bio-protocol.org/attached/file/20180730/Supplemental%20file%20Data%20example.xlsx)
Supplement: Supplementary file 1 [file Supplemental%20file%20Data%20example.xlsx]

## Sheet: Data
Date	Collector	Species	Individual	Sensor offset (V)	Reservoir Volume (mL)	Psix (MPa)	Pi (V)	Pf (V)	Pi (kPa)	Pf(kPa)	AD (mol)	AD (uL)	PAD (%)
2014-10-10	Paulo/Luciano	Drimys brasiliensis	1	1.219	3.915	-0.15	4.117	4.097	37.9949	38.409	6.65162e-07	16.5434	1.00503
2014-10-10	Paulo/Luciano	Drimys brasiliensis	1	1.219	3.915	-0.5	4.112	4.09	38.0984	38.5539	7.31679e-07	18.1978	1.10553
2014-10-10	Paulo/Luciano	Drimys brasiliensis	1	1.219	3.915	-1.6	4.1	3.65	38.3469	47.6644	1.49662e-05	372.227	22.6131
2014-10-10	Paulo/Luciano	Drimys brasiliensis	1	1.219	3.915	-1.7	4.06	3.112	39.1751	58.8041	3.15287e-05	784.159	47.6382
2014-10-10	Paulo/Luciano	Drimys brasiliensis	1	1.219	3.915	-3	4	2.475	40.4174	71.9936	5.07186e-05	1261.44	76.6332
2014-10-10	Paulo/Luciano	Drimys brasiliensis	1	1.219	3.915	-3.1	3.84	2.28	43.7303	76.0312	5.18827e-05	1290.39	78.392
2014-11-10	Paulo/Luciano	Drimys brasiliensis	1	1.2	3.915	-4.7	3.9	1.91	42.0946	83.2989	6.61837e-05	1646.07	100

## Sheet: Metadata
Metadata
Sensor offset (V)	Sensor reading at atmospheric pressure - in Volts
Reservoir Volume (mL)	Vacuum reservoir volume
Psix (MPa)	Sample xylem water potential
Pi (V)	Vacuum reservoir pressure before air discharge - in Volts
Pf (V)	Vacuum reservoir pressure after 2.5min of air discharge - in Volts
Pi (kPa)	Vacuum reservoir pressure before air discharge - in kPa. Sensor conversion factor used for conversion after removing sensor offset
Pf(kPa)	Vacuum reservoir pressure after 2.5min of air discharge - in kPa. Sensor conversion factor used for conversion after removing sensor offset
AD (mol)	Air discharged from sample after 2.5 minutes. Calculated as the difference between air in the vacuum reservoir before and after measurement. Some multipliers are to account for unit conversion (eg. kPa to Pa)
AD (uL)	Air discharged from sample after 2.5 minutes in equivalent uL at atmospheric pressure
PAD (%)	Percentage of maximum air discharged
Sensor is a PX141-015V5V (Omega Engineering, USA)
Vacuum reservoir is two rigid tubings (EW-30600-62, Cole Parmer, USA)
Voltmeter has a 0.001V resolution, allowing a 1Pa (0.83uL) precision approximately
